# Supplementary material
Source: Research Square preprint supplement (doi:10.21203/rs.3.rs-9139641/v1)
Supplement: Supplementary file 1 [file 34caa530215bf7b145f6fa18.docx]

**Additional information (Addendum)**

**11.1 Additional data**

**Supplemental Table 1: Error types, severity, and relative risks for AI and handwritten notes (HW).**

| **DISTORTIONS** | | | | | | | | | | |
| --- | --- | --- | --- | --- | --- | --- | --- | --- | --- | --- |
| **Error Severity Grade** | **Error count AI Note** | | **Error count HW Note** | | **Relative Risk HW over AI (median)** | | **Relative Risk HW over AI 95% Credible Interval** | | | **Posterior probability (HW > AI)** |
| 1/5 | 1 | | 2 | | 1.84 | | 0.22–25.17 | | | 0.71 |
| 2/5 | 0 | | 2 | | 9.51 | | 0.49–4545.43 | | | 0.92 |
| 3/5 | 3 | | 3 | | 1.00 | | 0.20–4.97 | | | 0.50 |
| 4/5 | 1 | | 6 | | 5.22 | | 0.98–61.91 | | | 0.97 |
| 5/5 | 0 | | 2 | | 9.37 | | 0.50–4591.03 | | | 0.92 |
| **Total** | 5 | | 15 | |  | | | | | |
| **HALLUCINATIONS** | | | | | | | | | | |
| **Error Severity Grade** | **Error count AI Note** | | **Error count HW Note** | | **Relative Risk HW over AI (median)** | | **Relative Risk HW over AI 95% Credible Interval** | | | **Posterior probability (HW > AI)** |
| 1/5 | 10 | | 1 | | 0.12 | | 0.01–0.55 | | | 0.00 |
| 2/5 | 10 | | 3 | | 0.37 | | 0.07–1.00 | | | 0.02 |
| 3/5 | 1 | | 19 | | 16.21 | | 3.76–184.04 | | | 1.00 |
| 4/5 | 0 | | 0 | | 0.99 | | 0.00–647.95 | | | 0.50 |
| 5/5 | 0 | | 0 | | 1.01 | | 0.00–618.75 | | | 0.50 |
| Total | 21 | | 23 | |  | | | | | |
| **OMISSIONS** | | | | | | | | | | |
| **Error Severity Grade** | **Error count AI Note** | | **Error count HW Note** | | **Relative Risk HW over AI (median)** | | **Relative Risk HW over AI 95% Credible Interval** | | | **Posterior probability (HW > AI)** |
| 1/5 | 1 | | 11 | | 9.42 | | 2.04–108.74 | | | 1.00 |
| 2/5 | 3 | | 27 | | 8.56 | | 3.13–33.03 | | | 1.00 |
| 3/5 | 11 | | 58 | | 5.20 | | 2.86–10.40 | | | 1.00 |
| 4/5 | 0 | | 35 | | 154.67 | | 13.49–74583.54 | | | 1.00 |
| 5/5 | 0 | | 0 | | 0.99 | | 0.00–644.67 | | | 0.50 |
| Total | 15 | | 131 | |  | | | | | |
| **OVERALL CLINICAL IMPACT OF ERRORS** | | | | | | | | | | |
| **Category** | | **Error count AI Note** | | **Error count HW Note** | | **Relative risk HW over AI (median)** | | **Relative Risk HW over AI 95% Credible Interval** | **Posterior probability**  **(HW > AI)** | |
| **None** | | 25 (51.0%) | | 4 (8.2%) | | 0.17 | | 0.05–0.38 | 0.00 | |
| **Minor** | | 23 (46.9%) | | 26 (53.1%) | | 1.12 | | 0.77–1.67 | 0.73 | |
| **Major** | | 1 (2.0%) | | 19 (38.8%) | | 16.13 | | 3.98–175.43 | 1.00 | |

**11.2 AI error examples:**

- **Hallucinations / fabrications (content not stated in the recording/transcript but asserted by the AI note)**
  - **Grade 1 error**
    - Safety-netting / return precautions added without being discussed in the audio/transcript (e.g., “return urgently if new neurological deficits / seizures / deterioration in headaches, cognition, vision,” “seek urgent care if thunderclap headache,” etc.).
  - **Grade 2 error:**
    - Patient education and restrictions invented (e.g., “avoid driving,” “avoid neck extension,” “activity modification,” “posture optimisation,” “gentle range-of-motion,” “consider physiotherapy” when not stated in audio/transcript).
  - **Grade 3 error**:
    - Fabricated operative step(s) with minor clinical significance (e.g., “I irrigated the wound”).
- **Distortions (present in audio/transcript context, but meaning altered or incorrectly interpreted)**
  - **Grade 1 error:**
    - Employment/status misrepresented due to poor audio (e.g., stated “employed” when the patient “works around the house”).
  - **Grade 3 error:**
    - Symptom/clinical feature misinterpreted (e.g., “up and down” interpreted as mood lability; “mild swelling” inserted when “no swelling” was said/recorded).
  - **Grade 4 error:**
    - Pregnancy status mistranscribed, driving an inappropriate pregnancy-specific plan and coding (pregnancy inferred from unclear audio).
- **Omissions (information discussed/asked in the recording but absent in the AI note)**
  - **Grade 1 error**:
    - Relevant past history missed despite being asked/discussed (e.g., “no past medical history” not captured)
  - **Grade 2 error:**
    - prior surgeon’s deliberate decision to leave tumour behind not stated
  - **Grade 3 error:**
    - Vision findings incompletely captured (e.g., new visual acuity (VA) findings not stated; visual fields stated as normal without support).

**11.3 HW error examples**:

- **Hallucinations / fabrications (content written in the handwritten note but not supported by what was said/done/available in the recording/transcript)**
  - **Grade 1 error:**
    - Imaging follow-up dates or imaging modality stated without being mentioned (e.g., MRI date given in the note when no follow-up imaging was discussed).
  - **Grade 2:**
    - Plans expanded or added as if clinician-directed when not recorded (e.g., detailed pain/feeding/thromboprophylaxis plans; line/drip injury risks; shunt escalation plans; neurology involvement if MRI normal).
  - **Grade 3 error:**
    - Invented examination findings despite no exam being dictated or evidenced (e.g., “entire examination” added; “normal gait” recorded when not tested/stated; full cranial nerve/pupil exam including RAPD written without support).
    - Vitals/status asserted without measurement (e.g., “apyrexial” in NSOPD where no temperature was taken; “GCS 15/15” and “PEARL” recorded despite not being formally assessed in the encounter).
    - Counselling/risk discussions documented as if performed (e.g., infection/bleeding/sympathetic chain/spinal cord injury counselled but not in the recording; “nature of condition explained,” “reason for operation explained,” “alternatives to surgery discussed” written without evidence).
- **Distortions (facts discussed/observed, but recorded incorrectly in the handwritten note)**
  - **Grade 1 error:**
    - Imaging type distorted (MRI/scans discussed but written CTB).
  - **Grade 2 error:**
    - Terminology errors that change meaning (e.g., “IONAT” intended to mean intra-operative monitoring; non-words such as “favectomy” creating ambiguity).
  - **Grade 3 error:**
    - Incorrect strength segment recorded (e.g., normal C5–T1 power in recording/transcript, but written weak T1 4/5).
  - **Grade 4 error**
    - dissection described to spinous processes but written as transverse processes
    - Wrong date copied forward (e.g., incorrect consultation date; incorrect date of previous surgery; wrong documented date such as “18/07/2025”).
  - **Grade 5 error:**
    - Wrong level / wrong-side documentation with patient safety implications (e.g., consented for C6/7 ACDF but written C5/6; thecal sac moved left in recording but written right).
- **Omissions (material content discussed/elicited, but missing from the handwritten note)**
  - **Grade 1 error:**
    - Administrative/social context incompletely captured (SASSA/temporary 6-month grant details; social worker involvement; referral source/location such as MPH).
  - **Grade 2 error:**
    - No Amytryptilline stated for pain control, while it was recorded in transcript.
    - Specific details left out that will aid in continuity of care.
  - **Grade 3 error:**
    - Operative detail missing despite being dictated (procedure steps; side/approach; level; instrumentation; intra-operative monitoring; closure method; start/end times; key intra-op findings such as thinned nerve root; recurrent pathology description).
    - Imaging specifics omitted even when carefully explained to the patient (dates, sequences, key findings such as chiasmatic compression; prior MRI comparisons).
    - Key history elements omitted (headache history; memory impairment and sleep disturbance; urinary urgency/word-finding issues; patient work/function; past medical history despite being asked; refusal of blood transfusion and rationale; prior surgeon’s deliberate residual tumour decision).
    - Post-operative course and plan omitted (analgesia; high care vs ICU disposition
  - **Grade 4 error:**
    - Consent content incompletely documented or absent despite extensive recorded counselling (nature of operation; benefits; alternatives; cranial/scalp/device/abdominal risks; ENT involvement; bleeding/vascular injury; cosmetic risks; anaesthetic risks).
    - Key examination components omitted (failed to document neuro deficits that were assessed).
    - Missing blood results and important endocrine functions omitted, but discussed and transcribed.
